# Supplementary material for: Yap5 Competes With Hap4 for the Regulation of Iron Homeostasis Genes in the Human Pathogen Candida glabrata
Source: Front Cell Infect Microbiol. 2021 Nov 26;11:731988. doi: 10.3389/fcimb.2021.731988 (PMC8662346; doi:10.3389/fcimb.2021.731988)
Supplement: Supplementary file 2 [file Table_1.xlsx]

## Sheet: Legend
Supplementary Table T1: list of ChIP-seq peaks for Hap4 and Hap5 (first and second sheets, respectively). First column: chromosome. Second and Third columns: Peak chromosomic coordinates. Third to sixth columns: peak features calculated from bpeaks (T1, T2, T3, T4). Eight column: presence of a CCAAT motif in the ChIP peak sequence. Ninth column: C. glabrata genes (ORF IDs) downstream of the ChIP …

## Sheet: Hap4 ChIP peaks
ChrA_C_glabrata_CBS138	106201	106851	1947.11572517291	295.663529169909	2.52228422380191	9.43528627485191	CAGL0A01045g/CAGL0A01067g	FUM1/KEL3	CCAAT
ChrA_C_glabrata_CBS138	111051	111551	1124.74380148603	207.549345824584	2.36509640188318	8.86629373592115	CAGL0A01089g/CAGL0A01111g	PBI1/ATP15	CCAAT
ChrA_C_glabrata_CBS138	123651	124651	845.939087205442	150.058220714657	2.52324456556474	8.38707028505014	CAGL0A01221g	AQY1	CCAAT
ChrA_C_glabrata_CBS138	187301	187451	509.379906315619	177.665159101922	1.51431320459111	8.23827111871861	CAGL0A01826g	HXT5	CCAAT
ChrA_C_glabrata_CBS138	311801	312301	390.743417864642	135.794197221774	1.54558506805955	7.83663654976077	CAGL0A03036g	ATP17	CCAAT
ChrA_C_glabrata_CBS138	361051	361751	1206.67221235126	79.8067759651106	3.93262532621035	8.19113790194487	CAGL0A03542g	COX12	CCAAT
ChrA_C_glabrata_CBS138	461301	461701	880.001022990362	115.63153502396	2.89975265532522	8.28742125048605	CAGL0A04675g/CAGL0A04697g	ATG8/YMR31	CCAAT
ChrB_C_glabrata_CBS138	25401	25751	819.160103375868	165.879147149087	2.31831702390183	8.50448936454241	CAGL0B00396g/CAGL0B00418g	MIC10/PRD1	CCAAT
ChrB_C_glabrata_CBS138	29701	30351	960.001174725775	133.524441638155	2.78165524831635	8.44028523379687	CAGL0B00440g	CAGL0B00440g	CCAAT
ChrB_C_glabrata_CBS138	89901	90101	575.589080923922	163.348247455985	1.81224059581751	8.26526539734305	CAGL0B00990g/CAGL0B01012g	HBN1/AGP1	CCAAT
ChrB_C_glabrata_CBS138	170951	171951	1013.00600333818	131.433209497658	2.94266957929358	8.44046776097986	CAGL0B01875g	COX26	CCAAT
ChrB_C_glabrata_CBS138	231601	232101	917.21819980617	157.101195283476	2.48994134480598	8.54398292564272	CAGL0B02409g/CAGL0B02431g	YML119w/NDI1	CCAAT
ChrB_C_glabrata_CBS138	277501	277701	743.156356000646	242.196091099984	1.61857471919446	8.73009308318032	CAGL0B02838g	MUP1
ChrB_C_glabrata_CBS138	369101	369451	674.455217250848	228.380794701987	1.56133507443969	8.60167120121494	CAGL0B03685g	YCP4	CCAAT
ChrB_C_glabrata_CBS138	479501	480401	933.346935067033	187.985079147149	2.26049803194209	8.63708187577468	CAGL0B04917g	IDP2	CCAAT
ChrC_C_glabrata_CBS138	36751	37001	596.021698164001	149.546438378291	1.99254501414877	8.22389439051902	CAGL0C00363g/CAGL0C00385g	KRE9/IOC2	CCAAT
ChrC_C_glabrata_CBS138	72051	72201	1134.06961718624	391.725730899693	1.53118675520377	9.38297169205591	CAGL0C00693g	CCC1
ChrC_C_glabrata_CBS138	139551	140151	1867.56775965111	159.202229042158	3.46413080807073	9.01718799535706	CAGL0C01325g	COX5B	CCAAT
ChrC_C_glabrata_CBS138	183151	183301	522.472460022614	161.348247455985	1.68902182785262	8.18745891456337	CAGL0C01705g/CAGL0C01727g	ALG7
ChrC_C_glabrata_CBS138	189001	189451	1033.71698548584	164.830675865888	2.65791199307639	8.62594567646389	CAGL0C01793g	OM14	CCAAT
ChrC_C_glabrata_CBS138	267951	268501	969.695436027208	126.381036989178	2.95271302886538	8.39367591126535	CAGL0C02623g	COX8	CCAAT
ChrC_C_glabrata_CBS138	321101	321901	2164.61116367077	156.231638092161	3.55394370323067	9.02121046500649	CAGL0C03223g	SDH2	CCAAT
ChrC_C_glabrata_CBS138	430001	430551	1238.41425725516	192.477880076814	2.60554491029766	8.8660333074599	CAGL0C04455g/CAGL0C04477g	ATP16/MED2	CCAAT
ChrD_C_glabrata_CBS138	21051	21651	605.641398804717	111.598352447101	2.46506512252764	8.00982984459271	CAGL0D00154g/CAGL0D00176g	AQY1/GDH1	CCAAT
ChrD_C_glabrata_CBS138	22201	22451	590.261185591988	175.646368384214	1.74278770383371	8.335144180788	CAGL0D00154g/CAGL0D00176g	AQY1/GDH1	CCAAT
ChrD_C_glabrata_CBS138	94801	95551	1133.574121243	156.518059714474	2.7768803516717	8.62127003465667	CAGL0D00748g/CAGL0D00770g	COX9/IDP1	CCAAT
ChrD_C_glabrata_CBS138	203701	204251	1621.6359769558	167.009296649258	3.18235453945608	8.94072588007084	CAGL0D01936g/CAGL0D01958g	SNF7/SHH3	CCAAT
ChrD_C_glabrata_CBS138	307701	308001	772.867509287676	222.878573736069	1.79523844924177	8.69330359886342	CAGL0D02948g	KAR2	CCAAT
ChrD_C_glabrata_CBS138	495701	496301	1216.3255693749	157.163608463899	2.88964660726811	8.7109434068741	CAGL0D05192g	QCR6	CCAAT
ChrD_C_glabrata_CBS138	514801	515001	995.63479244064	317.0625100953	1.64760722463147	9.1369169668183	CAGL0D05368g	SRB6
ChrD_C_glabrata_CBS138	530401	531151	801.057204627064	194.600648584173	2.02177002616191	8.60093725050911	CAGL0D05544g/CAGL0D05566g	PUF3/YEH1	CCAAT
ChrD_C_glabrata_CBS138	537051	537451	410.382948365908	138.234022505788	1.55487952416191	7.89384500329314	CAGL0D05632g	COX17
ChrD_C_glabrata_CBS138	607601	608201	2536.19269907931	253.257438216766	3.13751295282284	9.48153662047333	CAGL0D06424g	ACO1	CCAAT
ChrD_C_glabrata_CBS138	648251	648651	792.722204275023	244.686238087546	1.68485654019011	8.76433373134334	CAGL0D06710g/CAGL0D06732g	CAGL0D06710g/EPA21	CCAAT
ChrE_C_glabrata_CBS138	6951	7551	1100.80295590373	148.978662574705	2.81200011874785	8.62535769256733	CAGL0E00110g	CAGL0E00110g	CCAAT
ChrE_C_glabrata_CBS138	110801	110951	526.460022613471	150.356969794864	1.80110664189108	8.14236462167668	CAGL0E01221g/CAGL0E01243g	GIR2/TIS11
ChrE_C_glabrata_CBS138	119851	120751	1250.34878250686	179.507914714909	2.61933746680674	8.79146787438235	CAGL0E01265g/CAGL0E01287g	NUM1/KGD2	CCAAT
ChrE_C_glabrata_CBS138	127201	127551	628.117913099661	197.683282183815	1.69434798466899	8.43826968116339	CAGL0E01353g	ZRT2
ChrE_C_glabrata_CBS138	170651	171101	1066.08766181323	185.010314511849	2.50393061186817	8.77118089110105	CAGL0E01705g/CAGL0E01727g	MDH2/YPS3	CCAAT
ChrE_C_glabrata_CBS138	187501	187801	819.243337102245	270.915926344694	1.59098161608167	8.88172751285469	CAGL0E01859g/CAGL0E01881g	YPS10/YPS11	CCAAT
ChrE_C_glabrata_CBS138	205701	206201	573.192012598934	86.8615530608949	2.73680162511401	7.79192451030386	CAGL0E02079g	MSN1	CCAAT
ChrE_C_glabrata_CBS138	211801	211951	541.841059602649	155.703602002907	1.79249150585001	8.18814028480765	CAGL0E02123g/CAGL0E02145g	PTH4/SKM1	CCAAT
ChrE_C_glabrata_CBS138	215301	215551	557.170516340925	173.998869326442	1.6813708163643	8.28124585357169	CAGL0E02211g	CAGL0E02211g	CCAAT
ChrE_C_glabrata_CBS138	342351	342551	516.21765465999	148.232837990632	1.79328381441556	8.11786230281816	CAGL0E03652g	ISA1
ChrE_C_glabrata_CBS138	392251	393151	807.80080964303	220.420247132935	1.89715898337254	8.7057720559288	CAGL0E04070g/CAGL0E04092g	EFM1/SIT1	CCAAT
ChrE_C_glabrata_CBS138	418901	419501	1137.75960264901	192.629381360039	2.47992061907854	8.8128689936666	CAGL0E04356g	SOD2	CCAAT
ChrE_C_glabrata_CBS138	535451	535651	354.450250363431	155.58205459538	1.19118137273531	7.87782910289106	CAGL0E05456g	YOR338w	CCAAT
ChrE_C_glabrata_CBS138	566851	567151	678.809844936198	199.563075432079	1.76063508773464	8.52286306116969	CAGL0E05676g	TYW1	CCAAT
ChrE_C_glabrata_CBS138	607701	608101	734.360361815539	135.437005330318	2.43766136175178	8.2901712088544	CAGL0E06116g	RGM1	CCAAT
ChrE_C_glabrata_CBS138	643351	643801	739.034981655398	105.313196575674	2.86662608394429	8.06409043113115	CAGL0E06380g/CAGL0E06424g	YKL151c/MCR1	CCAAT
ChrF_C_glabrata_CBS138	15451	15851	629.594653529317	126.967560437194	2.28832257656768	8.14154929435057	CAGL0F00187g	FET4	CCAAT
ChrF_C_glabrata_CBS138	16251	17501	3047.86036181554	248.019397659359	3.10249159444079	9.43484531612622	CAGL0F00187g	FET4	CCAAT
ChrF_C_glabrata_CBS138	28301	28751	882.487920252902	106.780510879849	2.98042528438507	8.23674456648068	CAGL0F00209g/CAGL0F00231g	TNA1/MIR1	CCAAT
ChrF_C_glabrata_CBS138	70101	70401	452.797367145857	132.305281860766	1.83361630376636	7.90564506295333	CAGL0F00627g/ CAGL0F00649g	SLF1/RCK2	CCAAT
ChrF_C_glabrata_CBS138	114401	114751	711.711484412857	204.549410434502	1.81272603143014	8.55296218676834	CAGL0F01111g	OPI10	CCAAT
ChrF_C_glabrata_CBS138	190901	191351	1054.75275169024	211.710224519464	2.26493516127261	8.85396474637921	CAGL0F01947g	IRC15	CCAAT
ChrF_C_glabrata_CBS138	331351	331601	578.131373499166	159.934690141603	1.84669504468021	8.25176841948181	CAGL0F03311g	KSP1
ChrF_C_glabrata_CBS138	362301	362601	644.460628331449	168.602972056211	1.9598379095332	8.35103366564807	CAGL0F03707g	HRK1	CCAAT
ChrF_C_glabrata_CBS138	418401	419301	1547.77662130512	135.29701381037	3.35421656842026	8.70166743639238	CAGL0F04213g	AAC3	CCAAT
ChrF_C_glabrata_CBS138	424101	424451	673.220965918268	173.921983524471	1.9470701541515	8.41141383874455	CAGL0F04257g/CAGL0F04279g	HEK2/RIB1	CCAAT
ChrF_C_glabrata_CBS138	458351	459001	901.614698756259	120.537102245195	2.78767862024189	8.30013162342036	CAGL0F04565g	COR1	CCAAT
ChrF_C_glabrata_CBS138	486851	487201	793.348247455985	143.41330964303	2.45164919691468	8.3953796526234	CAGL0F04807g/CAGL0F04829g	OM45/PIN3	CCAAT
ChrF_C_glabrata_CBS138	587751	588251	1552.04924487159	136.719350670328	3.47530258726623	8.7272736192756	CAGL0F05863g/CAGL0F05885g	SHH4/HOF1	CCAAT
ChrF_C_glabrata_CBS138	632551	633051	714.14022371184	165.072080439347	2.13996669411631	8.3945299729639	CAGL0F06391g/CAGL0F06413g	BUB2/FET3	CCAAT
ChrF_C_glabrata_CBS138	633401	633651	1014.17643891671	295.722069671028	1.77549697607091	9.09705526499009	CAGL0F06391g/CAGL0F06413g	BUB2/FET3
ChrF_C_glabrata_CBS138	679101	679601	884.644625262478	239.192254886125	1.8793546618467	8.81394199482872	CAGL0F06919g/CAGL0F06941g	IRC24/PYC1	CCAAT
ChrF_C_glabrata_CBS138	688851	689001	515.072363107737	148.250363430787	1.78983892845215	8.11651009851705	CAGL0F07029g	MET13
ChrG_C_glabrata_CBS138	25351	25501	1226.99951542562	404.665320626716	1.59794811108853	9.46312022053178	CAGL0G00242g/CAGL0G00264g	PXR1
ChrG_C_glabrata_CBS138	106501	106901	661.909626877726	117.049507349378	2.48723433257091	8.11185952038977	CAGL0G01122g	CIS1	CCAAT
ChrG_C_glabrata_CBS138	145551	145751	509.428929090615	166.927394605072	1.60588384804732	8.19259406637398	CAGL0G01540g	NCE103
ChrG_C_glabrata_CBS138	247601	248001	934.49536962257	193.198837021483	2.35156540230177	8.62030578622718	CAGL0G02673g/CAGL0G02695g	IDH1/FMC1	CCAAT
ChrG_C_glabrata_CBS138	311751	312101	623.896236472298	132.31413341948	2.22609593084551	8.16872938498073	CAGL0G03267g/CAGL0G03289g	AST2/SSA3
ChrG_C_glabrata_CBS138	362551	363001	1202.97078708725	208.660336433071	2.50744352880316	8.94309778465726	CAGL0G03795g	SSA1	CCAAT
ChrG_C_glabrata_CBS138	370051	370651	1154.47512518172	228.207527055403	2.48232985871235	8.8289507462981	CAGL0G03883g	HSP104	CCAAT
ChrG_C_glabrata_CBS138	371801	372301	922.194660451808	264.528301451416	1.77174077330156	8.85311838841556	CAGL0G03905g	ISA1	CCAAT
ChrG_C_glabrata_CBS138	378751	379001	542.910407580897	126.204651914069	2.09626289064443	8.03750781240701	CAGL0G03971g/CAGL0G04015g	FRA1/GPI13
ChrG_C_glabrata_CBS138	545601	545951	438.85026651591	121.738523663382	1.85571789561284	7.84120220948786	CAGL0G05698g	GDH2
ChrG_C_glabrata_CBS138	726651	726951	677.593643999354	160.873889517041	2.14458565188829	8.32641803497571	CAGL0G07645g/CAGL0G07667g	CAGL0G07645g/PRY1	CCAAT
ChrG_C_glabrata_CBS138	731901	732151	641.910299897701	146.242071824692	2.12774863893783	8.2611824004065	CAGL0G07689g/CAGL0G07711g	YPT52/MIC60	CCAAT
ChrG_C_glabrata_CBS138	761001	761201	660.240914230334	177.554918429979	1.89886251767727	8.41857141739868	CAGL0G08041g/CAGL0G08063g	RLI1/UBC13	CCAAT
ChrG_C_glabrata_CBS138	775801	776251	915.406719431433	171.02429794402	2.39881764983041	8.57177409207244	CAGL0G08151g/CAGL0G08173g	GRX4/RPS31	CCAAT
ChrG_C_glabrata_CBS138	778251	778501	557.764335325473	151.42744844667	1.90549803420382	8.17119675603471	CAGL0G08195g	UPS2	CCAAT
ChrG_C_glabrata_CBS138	806501	806751	569.493458245841	172.03424325634	1.73098144323591	8.28991142608107	CAGL0G08558g/CAGL0G08602g	RHO3/RPI1	CCAAT
ChrG_C_glabrata_CBS138	807001	807551	556.857676465837	111.680726053949	2.33652447894818	7.95316581666287	CAGL0G08558g/CAGL0G08602g	RHO3/RPI1	CCAAT
ChrG_C_glabrata_CBS138	819101	819451	722.654853820061	152.523501857535	2.23227014851637	8.36910211380134	CAGL0G08646g	POG1	CCAAT
ChrG_C_glabrata_CBS138	827651	828101	2061.32867988093	297.982762996977	2.67405313581167	9.54072099727629	CAGL0G08712g	KGD1	CCAAT
ChrG_C_glabrata_CBS138	883551	884301	1479.23884547047	192.781345128785	2.77519555414745	8.96076506553297	CAGL0G09251g/CAGL0G09273g	YPL191c/YJR015w	CCAAT
ChrG_C_glabrata_CBS138	969701	970601	1056.35751494104	135.226276045873	2.99441541662437	8.52070965766779	CAGL0G10109g/CAGL0G10131g	RPC82/QCR2	CCAAT
ChrG_C_glabrata_CBS138	972651	973201	1379.71564457366	144.962598036576	3.26186929078983	8.68361942213989	CAGL0G10153g	QCR7	CCAAT
ChrH_C_glabrata_CBS138	51651	52301	2259.97437629403	107.263858093126	4.07174789711563	8.78193459541803	CAGL0H00506g/CAGL0H00528g	ATP2/JHD2	CCAAT
ChrH_C_glabrata_CBS138	69701	70251	1150.99680539852	286.876343796551	1.91576002569387	9.08639870647249	CAGL0H00704g	ATG41	CCAAT
ChrH_C_glabrata_CBS138	70301	70551	1105.88946319927	335.057179777096	1.68914847486647	9.21125495750957	CAGL0H00704g	ATG41	CCAAT
ChrH_C_glabrata_CBS138	138051	138701	1361.78655232669	106.245091848872	3.54124061338338	8.47901947209824	CAGL0H01397g/CAGL0H01419g	ATP5/BFR2	CCAAT
ChrH_C_glabrata_CBS138	226651	227251	1117.42975286707	120.635373929898	3.18782654020575	8.42799178020447	CAGL0H02491g	COX7	CCAAT
ChrH_C_glabrata_CBS138	322851	323351	728.515950573413	137.296559521887	2.36947312165364	8.29387302418019	CAGL0H03487g	AFT1	CCAAT
ChrH_C_glabrata_CBS138	342301	342801	1054.07856162171	236.743539008238	2.13675036265287	8.92194377789249	CAGL0H03707g/CAGL0H03729g	LST8	CCAAT
ChrH_C_glabrata_CBS138	374551	375251	892.394228180692	129.38123889517	2.72298164002356	8.36202097750218	CAGL0H03993g	CIT1	CCAAT
ChrH_C_glabrata_CBS138	375351	375501	526.991277661121	99.6637053787757	2.39097048788807	7.84888504249967	CAGL0H03993g	CIT1	CCAAT
ChrH_C_glabrata_CBS138	397151	397601	685.162932367261	148.483282183815	2.23278969301506	8.27994843512886	CAGL0H04191g/CAGL0H04213g	ATP18/TDA9	CCAAT
ChrH_C_glabrata_CBS138	444601	444951	648.722920368277	186.574479082539	1.78973708433045	8.44291112723582	CAGL0H04631g/CAGL0H04653g	YAP1/ERG6
ChrH_C_glabrata_CBS138	471551	471951	818.924810208367	88.3347870564798	3.30453325427886	7.99382160323266	CAGL0H04939g/CAGL0H04961g	FBP1/SEC61	CCAAT
ChrH_C_glabrata_CBS138	498801	499601	1016.74679834783	111.261947066017	3.16264059760798	8.33882584856531	CAGL0H05137g	ALD6	CCAAT
ChrH_C_glabrata_CBS138	531251	531801	1381.25773972972	161.384859742637	3.1222150617724	8.80738575120649	CAGL0H05489g	ATP4	CCAAT
ChrH_C_glabrata_CBS138	664351	665201	1337.19396974102	180.173326872342	2.75900403837485	8.86287865006092	CAGL0H06699g	GUT2	CCAAT
ChrH_C_glabrata_CBS138	681801	682301	645.611512679696	252.760620255209	1.32128671993699	8.60736526414885	CAGL0H06853g	ADH6
ChrH_C_glabrata_CBS138	695901	696251	748.835793894363	113.383233726377	2.73605939321954	8.16692596385527	CAGL0H07007g/CAGL0H07023g	PRE8/TIM11	CCAAT
ChrH_C_glabrata_CBS138	912001	912301	758.086011952835	115.079672104668	2.6995952864899	8.20665973484837	CAGL0H09328g	QCR9	CCAAT
ChrH_C_glabrata_CBS138	981101	981551	709.39185915038	227.176846574521	1.62896596198639	8.6439275372529	CAGL0H10054g/CAGL0H10076g	YBR053c/YRO2	CCAAT
ChrH_C_glabrata_CBS138	1042851	1043401	700.036396920261	159.763886645489	2.18027154518101	8.35349790835449	CAGL0H10604g/CAGL0H10626g	PUB1/AWP13	CCAAT
ChrI_C_glabrata_CBS138	43151	43651	1130.94611129058	172.455722015829	2.67207066317459	8.75545706527282	CAGL0I00572g	ATP14	CCAAT
ChrI_C_glabrata_CBS138	109351	109601	619.795994185107	161.529316750121	1.93445614903175	8.30925261797175	CAGL0I01320g	OSM1	CCAAT
ChrI_C_glabrata_CBS138	115151	115801	2669.07690048604	217.885170555498	3.3501593918628	9.39806577023619	CAGL0I01408g/CAGL0I01430g	CYC1/ANB1	CCAAT
ChrI_C_glabrata_CBS138	187401	187601	528.944112421257	177.877483443709	1.56747483812619	8.26589127809062	CAGL0I02156g/CAGL0I02178g	YAP1801/MPC2
ChrI_C_glabrata_CBS138	225651	226051	413.215689441663	136.90951919453	1.58269985001527	7.89343640571007	CAGL0I02552g	STB5	CCAAT
ChrI_C_glabrata_CBS138	274801	275651	1020.32310342971	134.949076616594	2.88409960182379	8.51142504418517	CAGL0I03190g/CAGL0I03212g	RIP1/YEL025c	CCAAT
ChrI_C_glabrata_CBS138	418651	419051	909.84539385129	125.69129919776	2.86745726788881	8.37124482245082	CAGL0I04686g	ATP3	CCAAT
ChrI_C_glabrata_CBS138	476201	476551	632.898788564045	161.595961880149	1.98180020704437	8.30729903876981	CAGL0I05082g/CAGL0I05098g	PIN4/SBH1	CCAAT
ChrI_C_glabrata_CBS138	524201	524701	660.398522048134	122.467230657406	2.4087013792103	8.14734506740505	CAGL0I05522g	UBP9	CCAAT
ChrI_C_glabrata_CBS138	603651	604201	1206.32513146324	125.130081300813	3.18984919994226	8.51508701630616	CAGL0I06270g/CAGL0I06292g	QCR8/PEX2	CCAAT
ChrI_C_glabrata_CBS138	619601	620351	2162.10481716636	172.448914677634	3.42712968642994	9.05091307643101	CAGL0I06380g/CAGL0I06402g	RPM2/VPS4	CCAAT
ChrI_C_glabrata_CBS138	652851	653401	1116.20667994759	173.538433927386	2.65345636819044	8.75198558620549	CAGL0I06721g/CAGL0I06743g	LSM5/FTR1	CCAAT
ChrI_C_glabrata_CBS138	676601	676801	451.039977386529	176.795025036343	1.35997814560395	8.13559831409848	CAGL0I07007g	MDM34	CCAAT
ChrI_C_glabrata_CBS138	697801	698301	1414.33385155871	231.023703763528	2.62675583779752	9.09294551535633	CAGL0I07227g	IDH2	CCAAT
ChrI_C_glabrata_CBS138	749001	749301	607.583629462122	155.621022451946	1.99031991546087	8.25130277580818	CAGL0I07755g	HAL9
ChrI_C_glabrata_CBS138	757651	758351	745.882759920314	208.696023797986	1.8425814314409	8.60931147233071	CAGL0I07843g/CAGL0I07865g	ADH1/PHM7	CCAAT
ChrI_C_glabrata_CBS138	778451	778651	376.705944112421	120.535454692295	1.63865535725004	7.7417769871596	CAGL0I07969g	ATP19	CCAAT
ChrI_C_glabrata_CBS138	895501	895751	599.363915361008	156.169870241749	1.93168396187686	8.26042549818199	CAGL0I09262g/CAGL0I09284g	MIC12/SHM1	CCAAT
ChrI_C_glabrata_CBS138	1060751	1061651	778.391273623001	156.899612340494	2.2825948484875	8.39249386859132	CAGL0I10725g/CAGL0I10747g	YGR122w/MEP3	CCAAT
ChrJ_C_glabrata_CBS138	33101	34301	1466.20874877021	136.10618786802	3.35309267980757	8.69963404755849	CAGL0J00429g	COX6	CCAAT
ChrJ_C_glabrata_CBS138	48351	48901	644.466716918825	148.720454423087	2.16776142283788	8.24287663094021	CAGL0J00561g	YHI9	CCAAT
ChrJ_C_glabrata_CBS138	91251	91901	2680.21473987166	281.199864906536	3.01128080101975	9.57309163578102	CAGL0J00847g	SDH1	CCAAT
ChrJ_C_glabrata_CBS138	155701	156351	2100.39106621048	139.034434149278	3.67329630710412	8.93762731323172	CAGL0J01699g	YPR010c-a	CCAAT
ChrJ_C_glabrata_CBS138	294851	295951	957.137732191891	193.310014537231	2.26849175570806	8.69606215590878	CAGL0J03058g/CAGL0J03080g/CAGL0J03102g	ICL1/RGI1/MOT2	CCAAT
ChrJ_C_glabrata_CBS138	383301	383701	1013.78199536962	223.469687180316	2.16449370443838	8.87372143495452	CAGL0J04026g/CAGL0J04048g	HER1/ISU2	CCAAT
ChrJ_C_glabrata_CBS138	401551	402601	1242.56302442425	117.022043883736	3.25209756000407	8.45027737730172	CAGL0J04268g	ACH1	CCAAT
ChrJ_C_glabrata_CBS138	557701	558351	749.85744702721	185.625159689285	2.00849334338508	8.50751088988918	CAGL0J05852g	IFA38	CCAAT
ChrJ_C_glabrata_CBS138	558351	558551	539.85462768535	164.534808593119	1.71996096702644	8.2170931362308	CAGL0J05852g	IFA38	CCAAT
ChrJ_C_glabrata_CBS138	587801	588051	404.237118397674	135.68179615571	1.56609510438911	7.8769801549299	CAGL0J06204g	FMP41	CCAAT
ChrJ_C_glabrata_CBS138	609951	610201	530.470575566683	101.903085123566	2.37716496251337	7.86467428575749	CAGL0J06380g	STF1
ChrJ_C_glabrata_CBS138	610301	610801	1095.86569213374	102.287998707802	3.35845781978306	8.35174585728326	CAGL0J06380g	STF1	CCAAT
ChrJ_C_glabrata_CBS138	686851	687251	1034.73679534809	303.922521940451	1.74937939758049	9.10028360909668	CAGL0J07106g/CAGL0J07128g	TOA1/AIM2
ChrJ_C_glabrata_CBS138	828251	828851	420.737812954289	196.080229365208	1.10515873535174	8.16326866030439	CAGL0J08316g	MET2	CCAAT
ChrJ_C_glabrata_CBS138	953001	953851	1878.87648737415	224.09428740645	2.90064934218244	9.1876179466366	CAGL0J09680g	HEM3	CCAAT
ChrJ_C_glabrata_CBS138	960901	961151	1134.32321111291	371.338125235557	1.61006547870455	9.32850288738836	CAGL0J09790g/CAGL0J09812g	GGC1/TPS1
ChrJ_C_glabrata_CBS138	968451	968851	785.416733968664	132.789721638938	2.54443896454168	8.31253887566612	CAGL0J09878g/CAGL0J09900g	TFC1/POR1	CCAAT
ChrJ_C_glabrata_CBS138	972201	972701	1119.10686884187	291.117751574867	1.94052681386014	9.10245879744326	CAGL0J09922g	SUN4	CCAAT
ChrJ_C_glabrata_CBS138	1138351	1138501	514.997577128089	176.531416572444	1.53928993996967	8.24157551126498	CAGL0J11682g	MIX17
ChrK_C_glabrata_CBS138	8301	9001	1297.4815494633	251.655467614279	2.4175162791106	9.01990590876677	CAGL0K00110g/CAGL0K00170g	AWP2/EPA22	CCAAT
ChrK_C_glabrata_CBS138	12351	12751	786.889581650783	215.671393958973	1.84800343432469	8.67222986354272	CAGL0K00110g/CAGL0K00170g	AWP2/EPA22	CCAAT
ChrK_C_glabrata_CBS138	86151	86451	1168.69140688096	349.53396058795	1.7391567487572	9.31990655201618	CAGL0K00803g	TRX2
ChrK_C_glabrata_CBS138	219301	219901	973.55488612502	102.663963818446	3.22900682418582	8.2062580617777	CAGL0K02409g	ATP20	CCAAT
ChrK_C_glabrata_CBS138	228451	229051	981.555742206429	165.048861250202	2.49841733777127	8.60081507595307	CAGL0K02519g	CAGL0K02519g
ChrK_C_glabrata_CBS138	249101	249251	577.936843805524	201.242771765466	1.51731783216028	8.41860324695527	CAGL0K02739g/CAGL0K02761g	LAG1/HSE1
ChrK_C_glabrata_CBS138	495001	495451	828.569351824077	178.320534416319	2.19382635600362	8.56194213698885	CAGL0K05071g/CAGL0K05093g	SSU72/YME1	CCAAT
ChrK_C_glabrata_CBS138	524701	524951	896.805093415173	282.806870187907	1.69207214542326	8.93981019868554	CAGL0K05357g	GLN1	CCAAT
ChrK_C_glabrata_CBS138	569401	569951	568.10843697841	142.861860406684	1.99593168355008	8.1521025708405	CAGL0K05797g/CAGL0K05813g	EMI1/GRX2	CCAAT
ChrK_C_glabrata_CBS138	721401	722151	946.735236012574	192.495235018575	2.28025882149668	8.67609584007778	CAGL0K07293g/CAGL0K07315g	FAA4/COA6	CCAAT
ChrK_C_glabrata_CBS138	782851	783001	513.622031981909	130.372476175093	1.96985017447883	8.02244432554296	CAGL0K07854g/CAGL0K07876g	DIB1/MDM36	CCAAT
ChrK_C_glabrata_CBS138	924201	924501	561.352891293814	174.756380229365	1.69479726508239	8.28590003208878	CAGL0K09350g	SIP2
ChrK_C_glabrata_CBS138	924701	924901	523.010418349217	173.739541269585	1.58615574013971	8.24001811603434	CAGL0K09350g	SIP2
ChrK_C_glabrata_CBS138	1026151	1026551	633.690922306574	201.78369137996	1.63806736471702	8.47597542947349	CAGL0K10516g	MIC19	CCAAT
ChrK_C_glabrata_CBS138	1045151	1045401	539.656275238249	127.558445054649	2.08012870332598	8.03841385099662	CAGL0K10736g	CYB2	CCAAT
ChrK_C_glabrata_CBS138	1059251	1059551	584.029034081732	180.732111129058	1.69355403216176	8.34114566606199	CAGL0K10868g/CAGL0K10890g	CTA1/OYE2
ChrK_C_glabrata_CBS138	1165951	1166101	511.388628654499	171.461960911	1.57096026976425	8.21561451346482	CAGL0K12034g/CAGL0K12056g	ENA1/RSM10
ChrK_C_glabrata_CBS138	1175151	1175451	608.89484735907	191.202027136165	1.67448252411944	8.41026163203921	CAGL0K12078g/CAGL0K12100g	NRG1/HEM13
ChrK_C_glabrata_CBS138	1183551	1183851	597.351558714263	182.470279437894	1.70510611785574	8.36695500243282	CAGL0K12078g/CAGL0K12100g	NRG1/HEM13
ChrK_C_glabrata_CBS138	1188951	1189201	394.134980886233	115.150164216874	1.76515557748528	7.74172139599958	CAGL0K12144g	FES1
ChrK_C_glabrata_CBS138	1221901	1222301	598.879152533247	141.167097399451	2.08472839462768	8.18188724327358	CAGL0K12518g	AGX1	CCAAT
ChrL_C_glabrata_CBS138	57451	57901	717.993677458061	213.307335533147	1.74644110837288	8.60594314288773	CAGL0L00495g	HSC82
ChrL_C_glabrata_CBS138	131801	132201	888.267458138158	227.72363107737	1.94875020813932	8.77972710523058	CAGL0L01089g/CAGL0L01111g	GLT1/SFA1	CCAAT
ChrL_C_glabrata_CBS138	277601	277851	581.994185107414	190.523071124751	1.61108762806727	8.37952615525675	CAGL0L02431g	EPS1	CCAAT
ChrL_C_glabrata_CBS138	277851	278001	519.555806816346	166.322080439347	1.63742499638468	8.2051965292691	CAGL0L02431g	EPS1
ChrL_C_glabrata_CBS138	293651	294401	779.89550588323	143.458519190388	2.47436125279456	8.34673386627218	CAGL0L02475g/CAGL0L02497g	GCN4/FBA1	CCAAT
ChrL_C_glabrata_CBS138	294651	294951	610.039533193345	206.772088515587	1.55904824877629	8.47005521934607	CAGL0L02475g/CAGL0L02497g	GCN4/FBA1	CCAAT
ChrL_C_glabrata_CBS138	388951	389201	615.923760297206	191.042857912023	1.68864991150854	8.41607985002762	CAGL0L03377g/CAGL0L03410g	SIP4/DPB11
ChrL_C_glabrata_CBS138	587251	587801	1098.66768965703	201.679804016583	2.38678087361351	8.83855020069685	CAGL0L05236g	MDH1	CCAAT
ChrL_C_glabrata_CBS138	588551	588801	552.395789587035	166.079524040273	1.72805742775588	8.24691237810788	CAGL0L05258g/CAGL0L05280g	SRX1/CYT2
ChrL_C_glabrata_CBS138	640151	640451	614.425981263124	187.824907123243	1.70362673954242	8.41187949923587	CAGL0L05786g	CMR3	CCAAT
ChrL_C_glabrata_CBS138	685501	685901	583.662870834006	133.185080493189	2.1491552263052	8.11143868130766	CAGL0L06072g/CAGL0L06094g	COM2/STR3
ChrL_C_glabrata_CBS138	685901	686351	665.399012391259	153.245540761936	2.09554544534401	8.31533615467891	CAGL0L06072g/CAGL0L06094g	COM2/STR3
ChrL_C_glabrata_CBS138	699801	700751	1724.21730785676	151.390234400981	3.50177252751806	8.84032456627366	CAGL0L06160g	COX4	CCAAT
ChrL_C_glabrata_CBS138	704901	705451	1393.07290152372	160.257829465712	3.04658763946933	8.77342757761939	CAGL0L06204g	COX13	CCAAT
ChrL_C_glabrata_CBS138	719851	720151	620.633621385883	183.805079954773	1.75274522412835	8.39968422653353	CAGL0L06374g/CAGL0L06402g	SLO1/YCF1	CCAAT
ChrL_C_glabrata_CBS138	753201	753851	1138.82116268484	220.526820457849	2.29575898774105	8.91674082756776	CAGL0L06666g	YHB1	CCAAT
ChrL_C_glabrata_CBS138	1045101	1045701	1070.69122920368	184.097577128089	2.47693744964621	8.74262096246077	CAGL0L09691g/CAGL0L09713g	PUT3/ATP7	CCAAT
ChrL_C_glabrata_CBS138	1061551	1062001	1079.82361492489	274.123243417865	1.92967950083801	9.02033100610545	CAGL0L09911g	YIL169c	CCAAT
ChrL_C_glabrata_CBS138	1062001	1062601	741.932789533193	217.347472136973	1.7547055577796	8.59011350267345	CAGL0L09911g	YIL169c
ChrL_C_glabrata_CBS138	1112451	1113351	2140.32593684381	133.202239137458	3.79652171544667	8.91412254419851	CAGL0L10384g/CAGL0L10406g	YNG1/CYT1	CCAAT
ChrL_C_glabrata_CBS138	1297751	1298151	1049.46594518925	240.123054972272	2.09823864548852	8.95495362197189	CAGL0L12056g	BMH1(A)	CCAAT
ChrM_C_glabrata_CBS138	202951	203101	544.863026974641	182.794378937167	1.57044633736942	8.30717200319585	CAGL0M01760g	CDR1
ChrM_C_glabrata_CBS138	260201	260401	531.795348085931	150.955015344855	1.81036765333691	8.15220109431912	CAGL0M02167g	PRM4	CCAAT
ChrM_C_glabrata_CBS138	260751	260951	560.54837667582	163.870537877564	1.76859261608912	8.2486498148664	CAGL0M02167g	PRM4	CCAAT
ChrM_C_glabrata_CBS138	307701	307851	563.646260701018	191.708932321111	1.55092388761367	8.36574157764234	CAGL0M02695g	RPL5	CCAAT
ChrM_C_glabrata_CBS138	558051	558251	674.743094815054	212.968260377968	1.65862293763173	8.57054105967472	CAGL0M05159g	RNT1
ChrM_C_glabrata_CBS138	637151	637351	597.098045549992	189.838879017929	1.65033087582662	8.39786100221166	CAGL0M06083g	SSE1
ChrM_C_glabrata_CBS138	879701	880051	1027.53920206752	245.231109675335	2.0794055462899	8.95431489053715	CAGL0M08822g	HSP78	CCAAT
ChrM_C_glabrata_CBS138	925601	925951	721.712130512034	159.879244063964	2.17123617402407	8.39889691570119	CAGL0M09295g	EAF6	CCAAT
ChrM_C_glabrata_CBS138	952651	953301	831.373316104022	86.2785495073494	3.34422252529007	7.99480647322	CAGL0M09581g	ATP1	CCAAT
ChrM_C_glabrata_CBS138	1060001	1060601	1527.58421902762	266.286270392505	2.47380339848805	9.23601739830089	CAGL0M10527g/CAGL0M10549g	UTP20/RCF2	CCAAT
ChrM_C_glabrata_CBS138	1163501	1163901	764.44131265816	200.779464814516	1.92730085341297	8.56102294499023	CAGL0M11682g/CAGL0M11704g	YLR108c/AHP1
ChrM_C_glabrata_CBS138	1164101	1164251	1281.39541269585	383.664513002746	1.7371685239885	9.45604119256427	CAGL0M11682g/CAGL0M11704g	YLR108c/AHP1
ChrM_C_glabrata_CBS138	1309151	1309551	750.364319172993	146.706267162009	2.33062338465683	8.36489477533181	CAGL0M13277g/CAGL0M13321g	YNK1/SVP26	CCAAT
ChrM_C_glabrata_CBS138	1394801	1394951	860.114036504604	301.446293005976	1.50952532687945	8.99529783132714	CAGL0M14091g	CAGL0M14091g	CCAAT
ChrM_C_glabrata_CBS138	1394951	1395201	682.455230711248	204.935390082378	1.74638432703771	8.5302063472287	CAGL0M14091g	CAGL0M14091g

## Sheet: Hap5 ChIP peaks
ChrA_C_glabrata_CBS138	106451	106801	750.571700856081	341.838572120821	1.11632049078575	8.95971023229207	CAGL0A01045g/CAGL0A01067g	FUM1/KEL3	CCAAT
ChrA_C_glabrata_CBS138	110951	111501	630.119510400402	185.761427879179	1.62815980726372	8.32071129323304	CAGL0A01089g/CAGL0A01111g	PBI1/ATP15	CCAAT
ChrA_C_glabrata_CBS138	311751	312201	631.82675312089	128.170016383229	2.26105026779816	8.12406184114793	CAGL0A03036g	ATP17	CCAAT
ChrA_C_glabrata_CBS138	361251	361751	707.070990146988	81.7390566952027	3.1508544818078	7.82578448777996	CAGL0A03542g	COX12	CCAAT
ChrA_C_glabrata_CBS138	461251	461651	179.454019275292	119.769611802078	0.57946202751984	7.19780873407788	CAGL0A04675g/CAGL0A04697g	ATG8/YMR31	CCAAT
ChrB_C_glabrata_CBS138	25651	25801	189.800678404135	94.8504280407042	0.993209521262455	7.07931773009144	CAGL0B00396g/CAGL0B00418g	MIC10/PRD1	CCAAT
ChrB_C_glabrata_CBS138	29901	30351	364.184576689665	123.081385421234	1.53966306716553	7.70483653511547	CAGL0B00440g	CAGL0B00440g	CCAAT
ChrB_C_glabrata_CBS138	171051	171451	242.885252786303	89.7811985139719	1.44969441772976	7.19393117593581	CAGL0B01875g	COX26	CCAAT
ChrB_C_glabrata_CBS138	231651	231951	337.72960749475	156.415522532709	1.10041518740581	7.84842075392545	CAGL0B02409g/CAGL0B02431g	YML119w/NDI1	CCAAT
ChrC_C_glabrata_CBS138	71851	72401	1284.68305245966	301.747985426874	1.98077410660848	9.17110192815483	CAGL0C00693g	CCC1
ChrC_C_glabrata_CBS138	139501	140101	761.992876756582	158.257179777096	2.20676135885368	8.38282525994743	CAGL0C01325g	COX5B	CCAAT
ChrC_C_glabrata_CBS138	189201	189451	220.831421956604	111.282829914392	0.983074782115537	7.2795567387213	CAGL0C01793g	OM14	CCAAT
ChrC_C_glabrata_CBS138	267851	268251	321.419156840575	117.081973832983	1.4628388001972	7.57706295716962	CAGL0C02623g	COX8	CCAAT
ChrC_C_glabrata_CBS138	268251	268451	300.737683734453	93.7346955257632	1.7015846373668	7.38366377405508	CAGL0C02623g	COX8
ChrC_C_glabrata_CBS138	321051	321851	812.270577105014	149.554249255832	2.231675982647	8.28115650416862	CAGL0C03223g	SDH2	CCAAT
ChrC_C_glabrata_CBS138	430001	430601	636.628945243095	185.915619447585	1.70904502067787	8.36129406341707	CAGL0C04455g/CAGL0C04477g	ATP16/MED2	CCAAT
ChrD_C_glabrata_CBS138	20951	21751	841.065048342063	127.000599949235	2.66995699115285	8.28091741476226	CAGL0D00154g/CAGL0D00176g	AQY1/GDH1	CCAAT
ChrD_C_glabrata_CBS138	94851	95251	365.803047434448	151.687341840306	1.32817653104159	7.8257017784045	CAGL0D00748g/CAGL0D00770g	COX9/IDP1	CCAAT
ChrD_C_glabrata_CBS138	203701	204151	403.282964518387	145.329106767889	1.44564905113512	7.89429115124659	CAGL0D01936g/CAGL0D01958g	SNF7/SHH3	CCAAT
ChrD_C_glabrata_CBS138	495701	496101	368.154875356701	166.32364184569	1.17977145860636	7.92852600780609	CAGL0D05192g	QCR6	CCAAT
ChrD_C_glabrata_CBS138	607651	608201	2107.2528221971	261.533480500368	2.89985818498315	9.40968114009948	CAGL0D06424g	ACO1	CCAAT
ChrE_C_glabrata_CBS138	7101	7451	363.553028589889	152.596543369407	1.22989947588945	7.87498348593645	CAGL0E00110g	CAGL0E00110g	CCAAT
ChrE_C_glabrata_CBS138	120201	120601	522.099230065148	167.198837021483	1.59828893462138	8.18555890516809	CAGL0E01265g/CAGL0E01287g	NUM1/KGD2	CCAAT
ChrE_C_glabrata_CBS138	342151	342601	274.568336525371	125.737129935159	1.11440827863817	7.52034351020827	CAGL0E03652g	ISA1
ChrE_C_glabrata_CBS138	419001	419601	710.757195929575	187.353497011791	1.82510533147436	8.4346600751662	CAGL0E04356g	SOD2	CCAAT
ChrE_C_glabrata_CBS138	535351	535601	281.732299574651	135.487589511657	1.05048390069602	7.61765815237997	CAGL0E05456g	YOR338w	CCAAT
ChrE_C_glabrata_CBS138	566751	567201	470.955211482105	188.7527055403	1.27551043001805	8.18609578412763	CAGL0E05676g	TYW1	CCAAT
ChrE_C_glabrata_CBS138	643501	643651	217.893393635923	106.3532547246	1.02786248224032	7.26015336222999	CAGL0E06380g/CAGL0E06424g	YKL151c/MCR1	CCAAT
ChrF_C_glabrata_CBS138	16351	16751	717.055106875572	242.106902492866	1.58069519544363	8.60098357446717	CAGL0F00187g	FET4	CCAAT
ChrF_C_glabrata_CBS138	28301	28551	218.325957034405	101.390997684811	1.09996171972281	7.22291954953628	CAGL0F00231g	MIR1	CCAAT
ChrF_C_glabrata_CBS138	70201	70401	216.782749151995	93.3820061379422	1.20685645570477	7.16154057763652	CAGL0F00627g/ CAGL0F00649g	SLF1/RCK2	CCAAT
ChrF_C_glabrata_CBS138	191051	191351	354.143837829107	223.5489016314	0.658226381808188	8.13939735193732	CAGL0F01947g	IRC15	CCAAT
ChrF_C_glabrata_CBS138	418451	418901	450.652560167986	161.026790040843	1.44902741246306	8.04815035606869	CAGL0F04213g	AAC3	CCAAT
ChrF_C_glabrata_CBS138	458351	458751	296.552764766058	105.681661551715	1.45959454808847	7.46543741855124	CAGL0F04565g	COR1	CCAAT
ChrF_C_glabrata_CBS138	486751	487401	184.519883702148	117.824390243902	0.632410237407021	7.17010815404547	CAGL0F04807g/CAGL0F04829g	OM45/PIN3	CCAAT
ChrF_C_glabrata_CBS138	587701	588051	336.075625908577	95.3650460345663	1.81660176480068	7.44110598104379	CAGL0F05863g/CAGL0F05885g	SHH4/HOF1	CCAAT
ChrF_C_glabrata_CBS138	679351	679651	408.78097237926	167.813923437248	1.24137988518156	7.9993992975961	CAGL0F06919g/CAGL0F06941g	IRC24/PYC1	CCAAT
ChrG_C_glabrata_CBS138	247651	247851	216.592634469391	105.465999030851	1.03324527752143	7.2488368827566	CAGL0G02673g/CAGL0G02695g	IDH1/FMC1	CCAAT
ChrG_C_glabrata_CBS138	371701	372501	1737.01379883241	185.895897270231	3.09687342222181	8.83085147752275	CAGL0G03905g	ISA1	CCAAT
ChrG_C_glabrata_CBS138	545751	545901	197.593765142949	105.419641414957	0.900055882698664	7.18364857854976	CAGL0G05698g	GDH2
ChrG_C_glabrata_CBS138	731801	732101	310.45949765789	114.929252140204	1.49836679427565	7.52181652922724	CAGL0G07689g/CAGL0G07711g	YPT52/MIC60	CCAAT
ChrG_C_glabrata_CBS138	742001	742151	194.920529801325	99.0783395251171	0.969138822326233	7.129555358916	CAGL0G07799g	PCP1	CCAAT
ChrG_C_glabrata_CBS138	760751	761501	840.73220431644	128.661034007182	2.62953875456187	8.15524262917471	CAGL0G08041g/CAGL0G08063g	RLI1/UBC13	CCAAT
ChrG_C_glabrata_CBS138	775451	776501	5849.5522957774	194.131651208461	3.81362137734293	9.46340214541884	CAGL0G08151g/CAGL0G08173g	GRX4/RPS31	CCAAT
ChrG_C_glabrata_CBS138	827851	828101	666.996661820923	337.431432724923	0.981172880283179	8.89235185919997	CAGL0G08712g	KGD1	CCAAT
ChrG_C_glabrata_CBS138	883601	884151	560.303379457636	186.498716775247	1.52102721531638	8.29249413603207	CAGL0G09251g/CAGL0G09273g	YPL191c/YJR015w	CCAAT
ChrG_C_glabrata_CBS138	969651	970201	538.555088928373	102.070281232614	2.33876316545004	7.82041778590869	CAGL0G10109g/CAGL0G10131g	RPC82/QCR2	CCAAT
ChrG_C_glabrata_CBS138	972651	973051	456.501103752759	150.274619070694	1.77006210133386	7.93488133762605	CAGL0G10153g	QCR7	CCAAT
ChrG_C_glabrata_CBS138	973051	973201	195.72363107737	103.674689064771	0.910257636637902	7.16489764066553	CAGL0G10153g	QCR7
ChrH_C_glabrata_CBS138	51651	52301	649.172038589742	107.263858093126	2.42914060099152	7.96063094735598	CAGL0H00506g/CAGL0H00528g	ATP2/JHD2	CCAAT
ChrH_C_glabrata_CBS138	137951	138851	1161.00420973995	101.609069617186	3.17060343057289	8.21157434822653	CAGL0H01397g/CAGL0H01419g	ATP5/BFR2	CCAAT
ChrH_C_glabrata_CBS138	226701	227001	311.281537716039	134.708084315943	1.24613599721136	7.66293173996231	CAGL0H02491g	COX7	CCAAT
ChrH_C_glabrata_CBS138	374701	375201	337.486230011307	130.007571474721	1.32520128712477	7.66310888100331	CAGL0H03993g	CIT1	CCAAT
ChrH_C_glabrata_CBS138	397301	397601	354.286262316266	123.574624454854	1.5590119678515	7.68297687108476	CAGL0H04191g/CAGL0H04213g	ATP18/TDA9	CCAAT
ChrH_C_glabrata_CBS138	471601	471951	297.7233726377	99.4552414795671	1.59444350721413	7.391874129328	CAGL0H04939g/CAGL0H04961g	FBP1/SEC61	CCAAT
ChrH_C_glabrata_CBS138	499001	499351	179.663996123405	115.065159101922	0.65753404889777	7.16492363072611	CAGL0H05137g	ALD6	CCAAT
ChrH_C_glabrata_CBS138	531301	531701	535.84130188984	146.149921929683	1.85356174851956	8.07375550376754	CAGL0H05489g	ATP4	CCAAT
ChrH_C_glabrata_CBS138	664351	664801	492.094653529317	190.580704709601	1.32370798641944	8.21295234633564	CAGL0H06699g	GUT2	CCAAT
ChrH_C_glabrata_CBS138	695851	696251	396.885155871426	117.550072686157	1.7470318929542	7.72641682267832	CAGL0H07007g/CAGL0H07023g	PRE8/TIM11	CCAAT
ChrH_C_glabrata_CBS138	911951	912451	408.972742691003	104.821414149572	1.88312605592607	7.64986638293608	CAGL0H09328g	QCR9	CCAAT
ChrH_C_glabrata_CBS138	1042851	1043051	133.068163463092	88.5235018575352	0.580430257874453	6.77107645579758	CAGL0H10604g/CAGL0H10626g	PUB1/AWP13	CCAAT
ChrI_C_glabrata_CBS138	43101	43651	560.780774960067	175.656347027046	1.60302270566531	8.24767254185452	CAGL0I00572g	ATP14	CCAAT
ChrI_C_glabrata_CBS138	115201	115901	725.713366910912	203.408657728961	1.71033929435602	8.45451971652695	CAGL0I01408g/CAGL0I01430g	CYC1/ANB1	CCAAT
ChrI_C_glabrata_CBS138	274951	275801	533.183018359985	125.21901685242	1.92750732363973	7.91507089252704	CAGL0I03190g/CAGL0I03212g	RIP1/YEL025c	CCAAT
ChrI_C_glabrata_CBS138	418451	418601	212.558068163463	85.2041673396866	1.30879888377625	7.0840851515072	CAGL0I04686g	ATP3
ChrI_C_glabrata_CBS138	418601	419301	955.599970387121	99.4223604156572	3.09794043622683	8.10362254841028	CAGL0I04686g	ATP3	CCAAT
ChrI_C_glabrata_CBS138	603501	604451	1678.45070168271	127.744999857478	3.26877057033068	8.57676639300345	CAGL0I06270g/CAGL0I06292g	QCR8/PEX2	CCAAT
ChrI_C_glabrata_CBS138	619651	620451	1828.27916099407	170.204051964834	3.15299449391414	8.90615634635158	CAGL0I06380g/CAGL0I06402g	RPM2/VPS4	CCAAT
ChrI_C_glabrata_CBS138	653001	653301	226.935834275561	145.144443547085	0.645464186291794	7.50685733121135	CAGL0I06721g/CAGL0I06743g	LSM5/FTR1	CCAAT
ChrI_C_glabrata_CBS138	676701	676851	223.789371668551	112.724761750929	0.983027412447676	7.32091630823979	CAGL0I07007g	MDM34	CCAAT
ChrI_C_glabrata_CBS138	697901	698051	288.235664674528	145.012275884348	0.986155789294318	7.68302375224606	CAGL0I07227g	IDH2	CCAAT
ChrI_C_glabrata_CBS138	778401	778551	197.835890809239	97.2731384267485	1.0167091583494	7.12707980421552	CAGL0I07969g	ATP19	CCAAT
ChrI_C_glabrata_CBS138	1060651	1061651	490.867989375258	149.832705181356	1.56284817920793	7.95569813726553	CAGL0I10725g/CAGL0I10747g	YGR122w/MEP3	CCAAT
ChrJ_C_glabrata_CBS138	33051	33551	373.475024228719	104.388103698918	1.8329047954811	7.57495509562467	CAGL0J00429g	COX6	CCAAT
ChrJ_C_glabrata_CBS138	91451	91901	560.372499250063	227.794009737638	1.25985856017968	8.42107139057991	CAGL0J00847g	SDH1	CCAAT
ChrJ_C_glabrata_CBS138	155701	156301	531.295816507834	136.701372960749	1.89425092142397	8.02300698397076	CAGL0J01699g	YPR010c-a	CCAAT
ChrJ_C_glabrata_CBS138	295251	295401	215.310127604587	160.479244063964	0.421752475396139	7.54608116570232	CAGL0J03058g/CAGL0J03080g/CAGL0J03102g	ICL1/RGI1/MOT2	CCAAT
ChrJ_C_glabrata_CBS138	383051	383751	1267.56944220104	204.978894093577	2.42428722463124	8.84493686173228	CAGL0J04026g/CAGL0J04048g	HER1/ISU2	CCAAT
ChrJ_C_glabrata_CBS138	401651	402301	495.391315839709	101.084418731002	2.26125683699068	7.73649309961401	CAGL0J04268g	ACH1	CCAAT
ChrJ_C_glabrata_CBS138	587701	587901	143.002826683896	104.537392989824	0.447368216720821	6.94275511673747	CAGL0J06204g	FMP41	CCAAT
ChrJ_C_glabrata_CBS138	610451	610751	234.847237926022	92.3129139072848	1.34187446317203	7.20441239886231	CAGL0J06380g	STF1	CCAAT
ChrJ_C_glabrata_CBS138	952951	953901	2544.64799946792	216.680313928188	3.28314804242156	9.33125050544021	CAGL0J09680g	HEM3	CCAAT
ChrJ_C_glabrata_CBS138	968601	968751	216.399773865288	109.257147472137	0.979478257496767	7.27446750073104	CAGL0J09878g/CAGL0J09900g	TFC1/POR1	CCAAT
ChrJ_C_glabrata_CBS138	972151	972401	500.236903031282	189.264039196683	1.55324589727489	8.16700126219478	CAGL0J09922g	SUN4	CCAAT
ChrK_C_glabrata_CBS138	219351	219901	367.427358710673	94.1256303953768	2.00980446248023	7.49619332230044	CAGL0K02409g	ATP20	CCAAT
ChrK_C_glabrata_CBS138	258151	258401	205.298013245033	78.3462553168578	1.3752173820875	6.98328334103421	CAGL0K02893g	QCR10	CCAAT
ChrK_C_glabrata_CBS138	721351	721551	162.439508964626	106.001453723147	0.612101033931313	7.04632924147244	CAGL0K07293g/CAGL0K07315g	FAA4/COA6	CCAAT
ChrK_C_glabrata_CBS138	1026051	1026201	189.442577935713	90.1364884509772	1.06325537450139	7.04158456577843	CAGL0K10516g	MIC19	CCAAT
ChrK_C_glabrata_CBS138	1045001	1045351	168.801615247941	110.262348570506	0.605330434477635	7.09676635358237	CAGL0K10736g	CYB2	CCAAT
ChrK_C_glabrata_CBS138	1059051	1059701	407.131349025712	131.808446278322	1.56166177006714	7.77088273635179	CAGL0K10868g/CAGL0K10890g	CTA1/OYE2	CCAAT
ChrK_C_glabrata_CBS138	1166651	1167051	731.284929736715	214.62445485382	1.74767471789613	8.61593076418915	CAGL0K12034g/CAGL0K12056g	ENA1/RSM10	CCAAT
ChrK_C_glabrata_CBS138	1167051	1167251	216.421014375707	106.657809723793	1.01070939883395	7.24875652507758	CAGL0K12034g/CAGL0K12056g	ENA1/RSM10
ChrK_C_glabrata_CBS138	1183451	1184001	569.589565498304	159.994454315404	1.73321560912008	8.17698766990478	CAGL0K12100g	HEM13
ChrK_C_glabrata_CBS138	1221951	1222101	163.634953965434	118.405265708286	0.463404209569284	7.13142475464384	CAGL0K12518g	AGX1	CCAAT
ChrL_C_glabrata_CBS138	131551	132501	1129.83688846238	156.215037008181	2.48571281032408	8.43682901198627	CAGL0L01089g/CAGL0L01111g	GLT1/SFA1	CCAAT
ChrL_C_glabrata_CBS138	587401	587701	530.035293167501	223.978355677597	1.23219436963743	8.42832998561548	CAGL0L05236g	MDH1	CCAAT
ChrL_C_glabrata_CBS138	699701	700401	760.190666558983	153.735355085339	2.25884777860939	8.2800557724017	CAGL0L06160g	COX4	CCAAT
ChrL_C_glabrata_CBS138	704951	705151	185.968987239541	88.5828622193507	1.05954690622487	7.01444226958373	CAGL0L06204g	COX13	CCAAT
ChrL_C_glabrata_CBS138	1045001	1045651	589.624675114903	170.280186781398	1.65801721700021	8.1858630094522	CAGL0L09691g/CAGL0L09713g	PUT3/ATP7	CCAAT
ChrL_C_glabrata_CBS138	1062551	1062701	125.58261993216	77.9505734130189	0.681057683771403	6.64340668109942	CAGL0L09911g	YIL169c	CCAAT
ChrL_C_glabrata_CBS138	1112451	1113301	722.583341409573	137.997846336079	2.20528309333136	8.18886587387829	CAGL0L10384g/CAGL0L10406g	YNG1/CYT1	CCAAT
ChrL_C_glabrata_CBS138	1297851	1298101	352.808216227858	244.245840736553	0.53187577767442	8.19971889477987	CAGL0L12056g	BMH1(A)	CCAAT
ChrM_C_glabrata_CBS138	925651	925851	302.595945727669	140.676142787918	1.10198603328986	7.6949975807699	CAGL0M09295g	EAF6	CCAAT
ChrM_C_glabrata_CBS138	952701	953301	718.784705396723	76.378614117267	3.01596284785654	7.71674512735105	CAGL0M09581g	ATP1	CCAAT
ChrM_C_glabrata_CBS138	1060001	1060251	393.959726484682	182.851504872665	1.10088945874479	8.06922677921932	CAGL0M10527g/CAGL0M10549g	UTP20/RCF2	CCAAT

## Sheet: Yap5 ChIP peaks
ChrC_C_glabrata_CBS138	72001	72251	CAGL0C00693g	CCC1
ChrC_C_glabrata_CBS138	321301	321551	CAGL0C03223g	SDH2
ChrD_C_glabrata_CBS138	607801	608001	CAGL0D06424g	ACO1
ChrE_C_glabrata_CBS138	566801	567201	CAGL0E05676g	TYW1
ChrG_C_glabrata_CBS138	371901	372301	CAGL0G03905g	ISA1
ChrG_C_glabrata_CBS138	760951	761301	CAGL0G08041g/CAGL0G08063g	RLI1/UBC13
ChrG_C_glabrata_CBS138	775701	776301	CAGL0G08151g/CAGL0G08173g	GRX4/RPS31
ChrJ_C_glabrata_CBS138	953251	953751	CAGL0J09680g	HEM3
ChrL_C_glabrata_CBS138	131901	132201	CAGL0L01089g/CAGL0L01111g	GLT1/SFA1
